# Supplementary material for: Quinoline benzimidazole-conjugate for the highly selective detection of Zn(ii) by dual colorimetric and fluorescent turn-on responses
Source: Royal Society of Chemistry journal article supplement (doi:10.1039/c5ra04523a), 2015-01-01
Supplement: c5ra04523a1.pdf [file c5ra04523a1.pdf]

## Supporting Information for

### Quinoline benzimidazole-conjugate for the highly selective detection of Zn(II) by dual colorimetric and fluorescent turn-on responses

K. Velmurugan<sup>a</sup>, A. Raman<sup>b,c</sup>, Derin Don<sup>a</sup>, Lijun Tang<sup>d,\*</sup>, S. Easwaramoorthi<sup>b,c,\*</sup> and R. Nandhakumar<sup>a,\*</sup>

<sup>a</sup>Department of Chemistry, Karunya University, Karunya Nagar, Coimbatore-641 114, India. \*E-mail: [nandhakumar@karunya.edu](mailto:nandhakumar@karunya.edu)

<sup>b</sup>Chemical Laboratory, CSIR-Central Leather Research Institute, Adyar, India  
\*E-mail: [moorthi@clri.res.in](mailto:moorthi@clri.res.in)

<sup>c</sup>Academy of Scientific and Innovative Research (AcSIR), Anusandhan Bhawan, 2 Rafi Marg, New Delhi – 110001, India

<sup>d</sup>College of Chemistry and Chemical Engineering, Liaoning Key Laboratory for the Synthesis and Application of Functional Compounds, Bohai University, Jinzhou 121013, P. R. China  
\*E-mail: [ijuntang@tom.com](mailto:ijuntang@tom.com)

|                                                                                                                                                                                                                                                                          |    |
|--------------------------------------------------------------------------------------------------------------------------------------------------------------------------------------------------------------------------------------------------------------------------|----|
| 1. <sup>1</sup> H spectrum of <b>QBC</b> -----                                                                                                                                                                                                                           | S2 |
| 2. <sup>13</sup> C-NMR spectrum of <b>QBC</b> -----                                                                                                                                                                                                                      | S3 |
| 3. Mass Spectrum (LC-MS) of <b>QBC</b> -----                                                                                                                                                                                                                             | S3 |
| 4. Absorption spectrum of <b>QBC</b> -----                                                                                                                                                                                                                               | S4 |
| 5. Geometry of the <b>QBC</b> optimized using Gaussian 03 at B3LYP /6-31G level of theory-----                                                                                                                                                                           | S4 |
| 6. Highest occupied molecular orbital (top) and Lowest Unoccupied Molecular Orbital (bottom) of <b>QBC</b> calculated using Gaussian 03 software at B3LYP /6-31G level of theory-----                                                                                    | S5 |
| 7. Geometry of the <b>QBC</b> +Zn <sup>2+</sup> optimized using Gaussian 03 at B3LYP /GenECP level of theory-----                                                                                                                                                        | S5 |
| 8. Highest Occupied Molecular Orbital (top) Lowest Unoccupied Molecular Orbital (bottom) of <b>QBC</b> +Zn <sup>2+</sup> calculated using Gaussian 03 at B3LYP /GenECP level of theory-----                                                                              | S6 |
| 9. Changes of absorption intensity of <b>QBC</b> (4 x 10 <sup>-6</sup> M) solution (CH <sub>3</sub> CN- H <sub>2</sub> O, 1:1 v/v, HEPES = 50 mM, pH=7.0) upon addition of different amount of Zn <sup>2+</sup> (0-90 equiv.).---                                        | S6 |
| 10. Changes of fluorescence intensity of <b>QBC</b> (4 x 10 <sup>-6</sup> M) solution (CH <sub>3</sub> CN-H <sub>2</sub> O, 1:1 v/v, HEPES = 50 mM, pH=7.0) upon addition of different amount of Zn <sup>2+</sup> (0-95 equiv. excited at 380 nm) emission = 425 nm----- | S7 |

|                                                                                                                                                                       |     |
|-----------------------------------------------------------------------------------------------------------------------------------------------------------------------|-----|
| 11. 2D-NMR ( $^1\text{H}$ – $^1\text{H}$ COSY) spectrum of <b>QBC</b> -----                                                                                           | S7  |
| 12. 2D-NMR ( $^1\text{H}$ – $^1\text{H}$ COSY) spectrum of <b>QBC</b> and <b>QBC+Zn<sup>2+</sup></b> -----                                                            | S8  |
| 13. $^1\text{H}$ -NMR Spectrum of (a) <b>QBC</b> (b) <b>QBC+Zn<sup>2+</sup></b> (c) Titration spectrum of <b>QBC</b> with<br>different equ. of Zn <sup>2+</sup> ----- | S8  |
| 14. TD spectra of <b>QBC</b> by Gaussian 03 at B3LYP /6-31G level of theory-----                                                                                      | S9  |
| 15. TD spectra of <b>QBC–Zn<sup>2+</sup></b> by Gaussian 03 at B3LYP /6-31G<br>level of theory-----                                                                   | S9  |
| 16. $^1\text{H}$ NMR spectra of <b>QBC</b> by Gaussian 03 at SCF /6-31G level of theory-----                                                                          | S10 |
| 17. $^1\text{H}$ NMR spectra of <b>QBC+Zn<sup>2+</sup></b> by Gaussian 03 at SCF /6-31G level of theory-----                                                          | S11 |
| 18. The effect of pH <b>QBC</b> and <b>QBC+Zn<sup>2+</sup></b> -----                                                                                                  | S12 |
| 19. The effective time response of <b>QBC</b> and <b>QBC+Zn<sup>2+</sup></b> -----                                                                                    | S12 |
| 20. Experimental Section -----                                                                                                                                        | S13 |

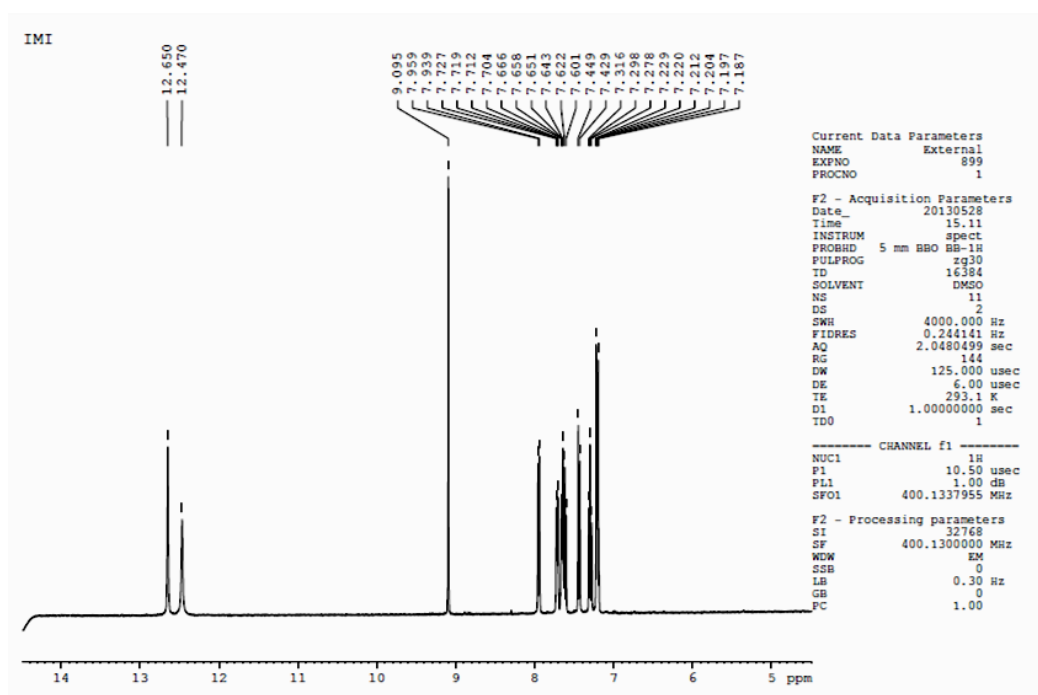

**Fig. S1.**  $^1\text{H}$ -NMR Spectrum of **QBC**

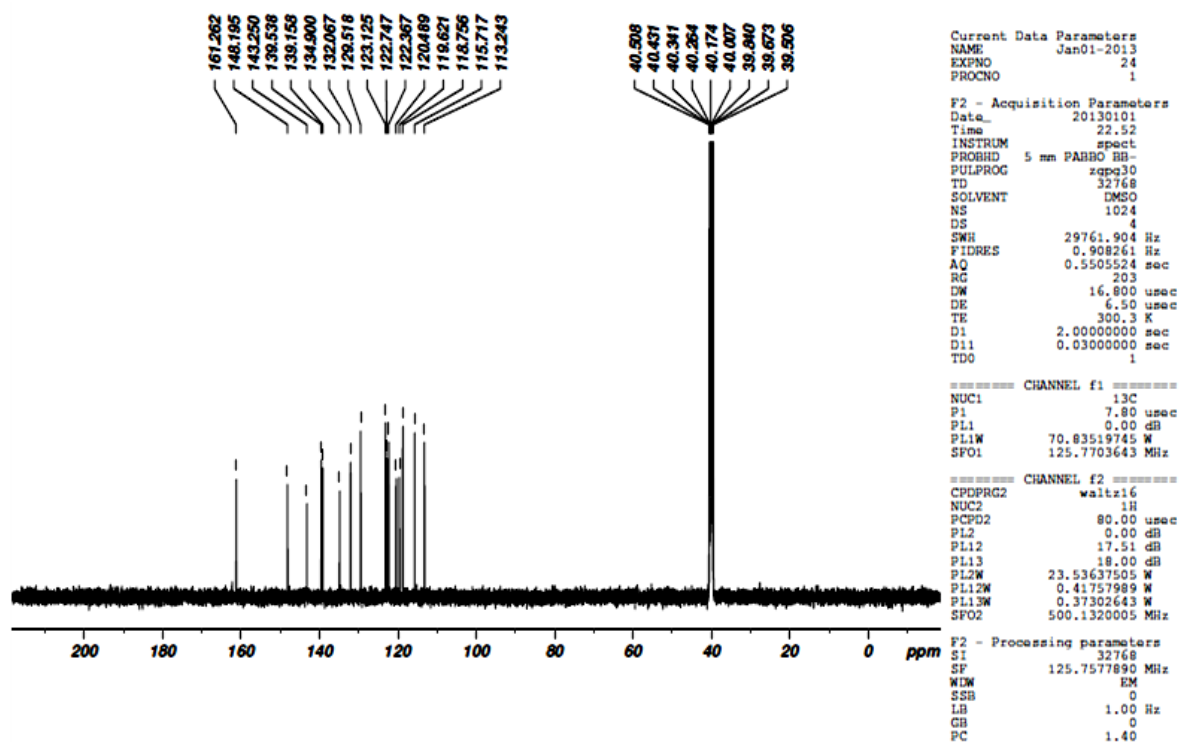

Fig. S2.  $^{13}\text{C}$ -NMR Spectrum of QBC

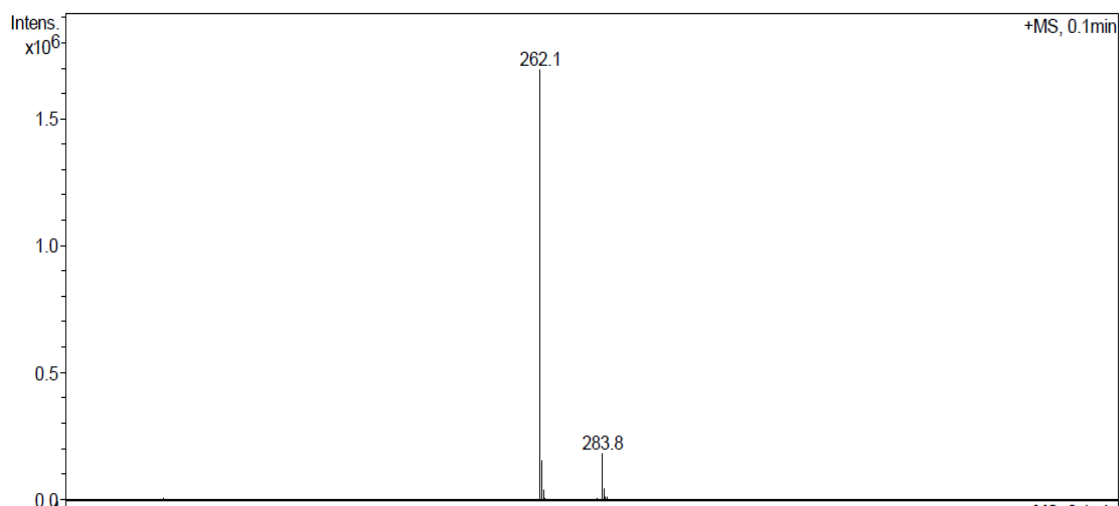

Fig. S3. LC- Mass spectrum of QBC

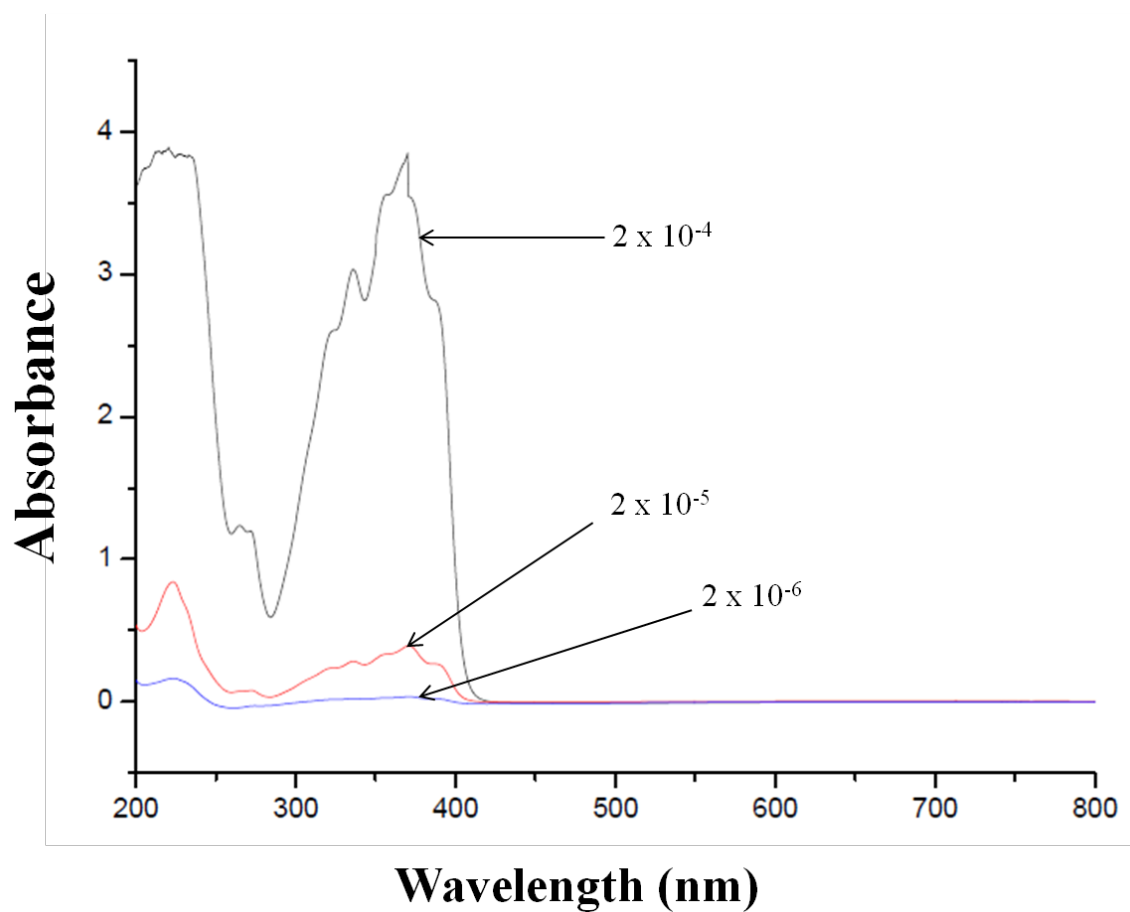

**Fig. S4.** Absorption spectrum of **QBC** in  $\text{CH}_3\text{CN}:\text{H}_2\text{O}$  (1:1 v/v) solution

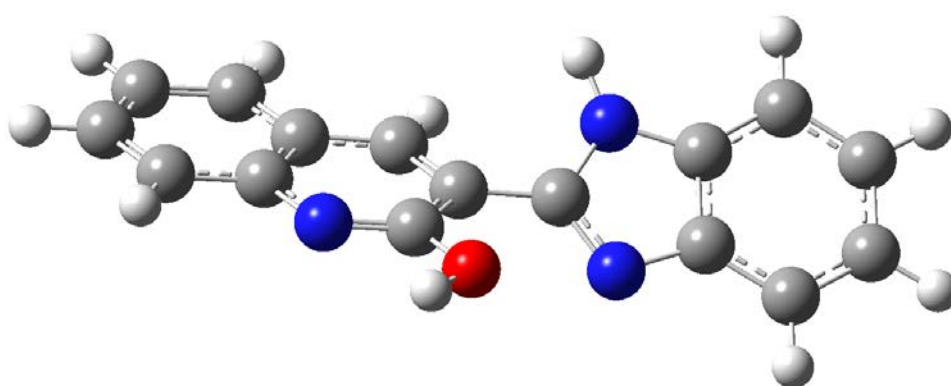

**Fig. S5.** Geometry of the **QBC** optimized using Gaussian 03 at B3LYP /6-31G level of theory

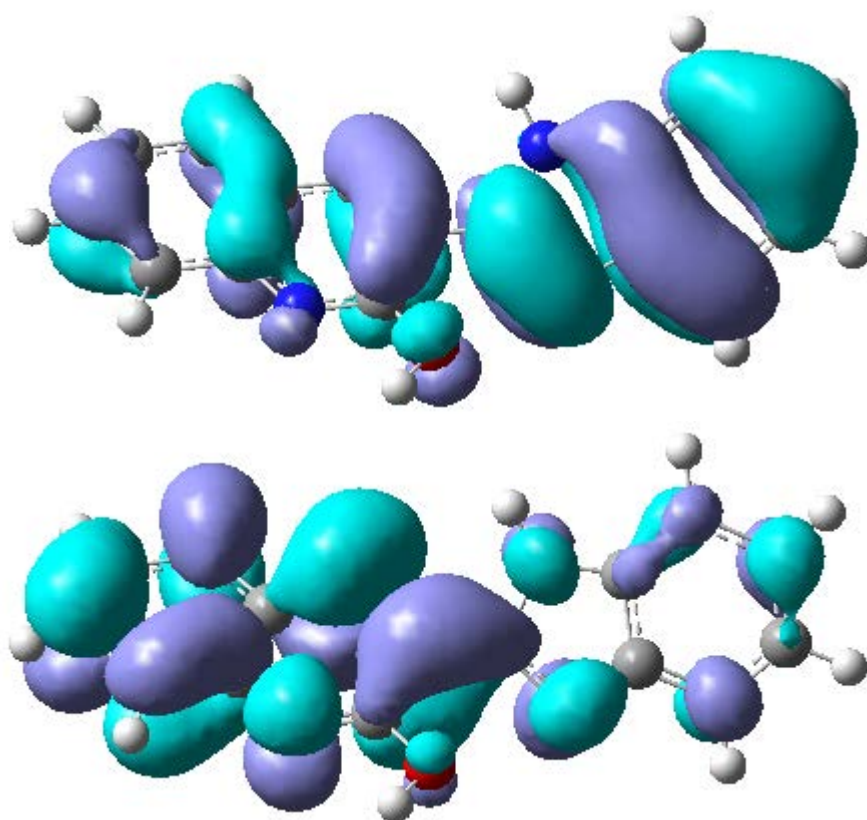

**Fig. S6.** Highest occupied molecular orbital (top) and Lowest Unoccupied Molecular Orbital (bottom) of **QBC** calculated using Gaussian 03 software at B3LYP /6-31G level of theory

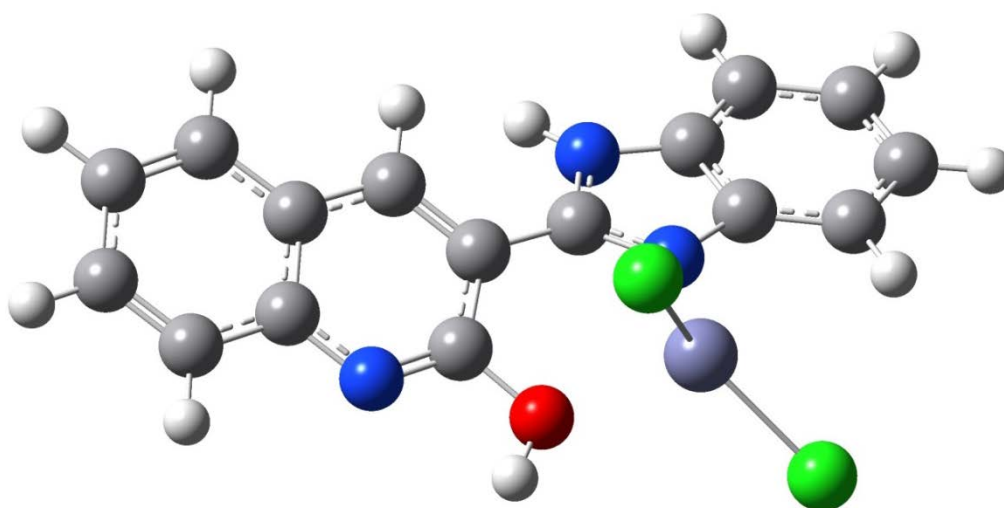

**Fig. S7.** Geometry of the **QBC+Zn<sup>2+</sup>** optimized using Gaussian 03 at B3LYP /GenECP level of theory

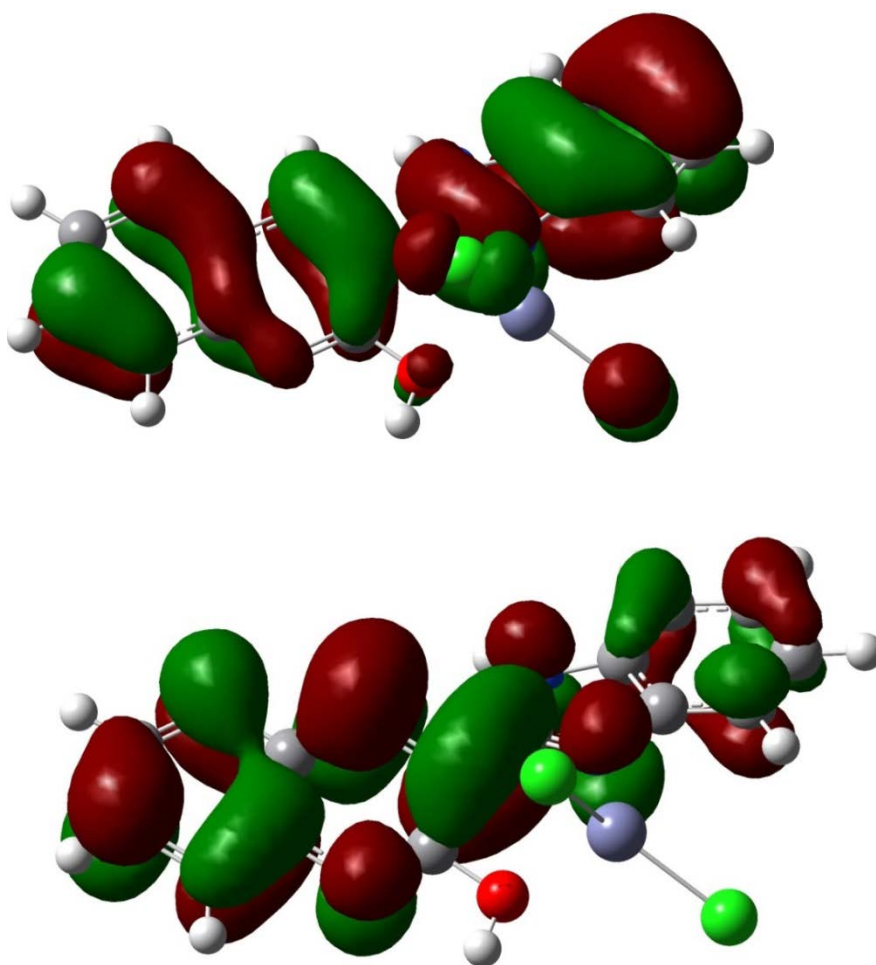

**Fig. S8.** Highest Occupied Molecular Orbital (top) Lowest Unoccupied Molecular Orbital (bottom) of **QBC**+ $\text{Zn}^{2+}$  calculated using Gaussian 03 at B3LYP /GenECP level of theory.

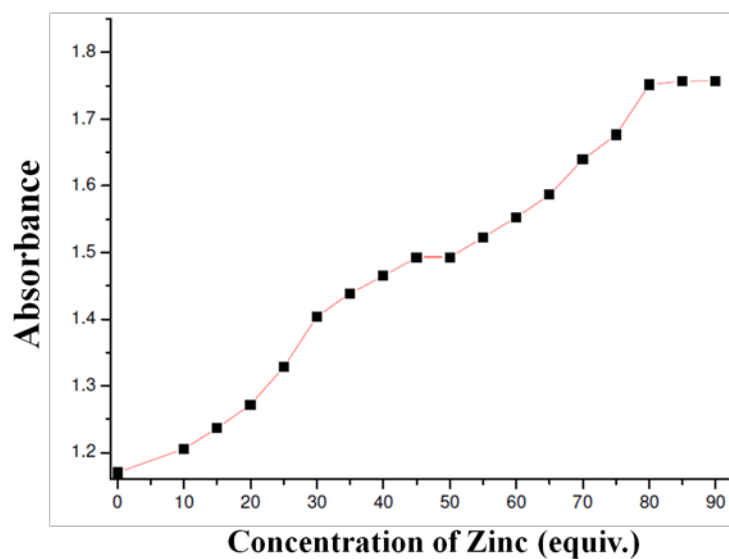

**Fig. S9.** Changes of absorption intensity of **QBC** ( $4 \times 10^{-6}$  M) solution ( $\text{CH}_3\text{CN}-\text{H}_2\text{O}$ , 1:1 v/v, HEPES = 50 mM, pH=7.0) upon addition of different amount of  $\text{Zn}^{2+}$  (0-90 equiv.).

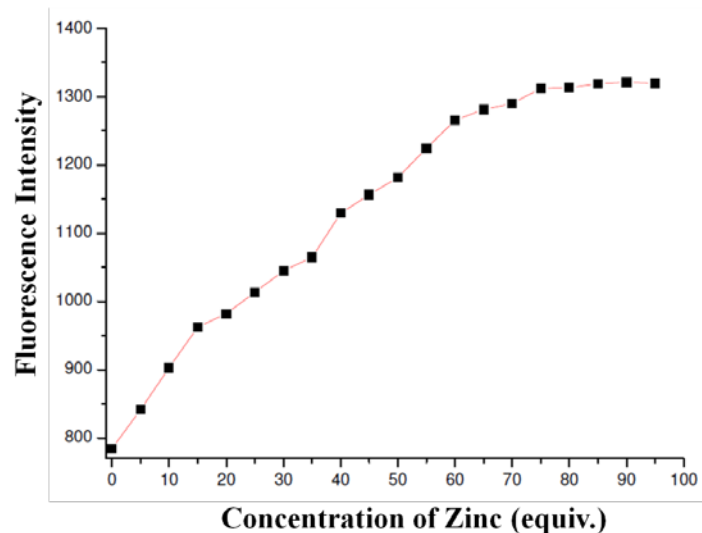

**Fig. S10.** Changes of fluorescence intensity of **QBC** ( $4 \times 10^{-6}$  M) solution ( $\text{CH}_3\text{CN-H}_2\text{O}$ , 1:1 v/v, HEPES = 50 mM, pH=7.0) upon addition of different amount of  $\text{Zn}^{2+}$  (0-95 equiv. excited at 380 nm) emission = 425 nm.

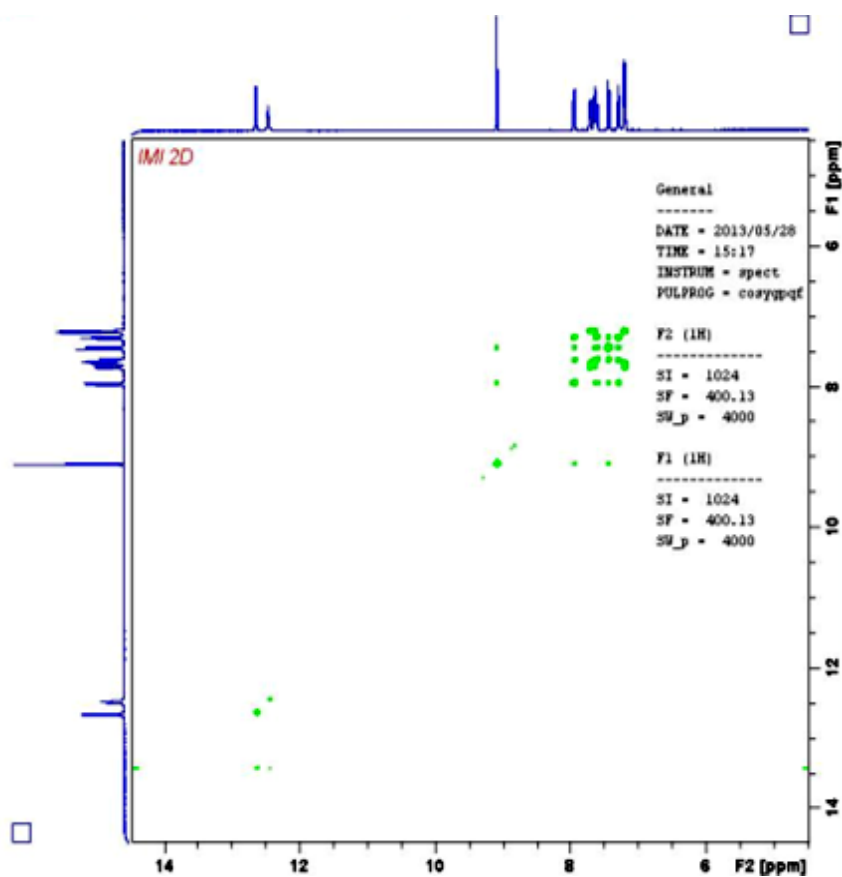

**Fig. S11.** 2D ( $^1\text{H}$ - $^1\text{H}$  COSY) NMR Spectrum of **QBC**

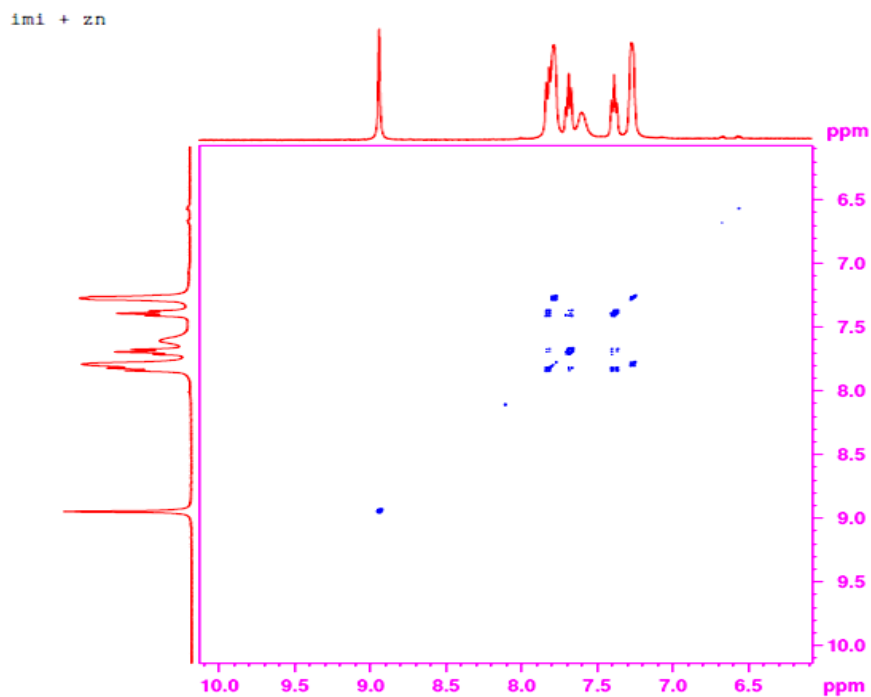

**Fig. S12.** 2D ( $^1\text{H}$ - $^1\text{H}$  COSY) NMR Spectrum of **QBC**+ $\text{Zn}^{2+}$

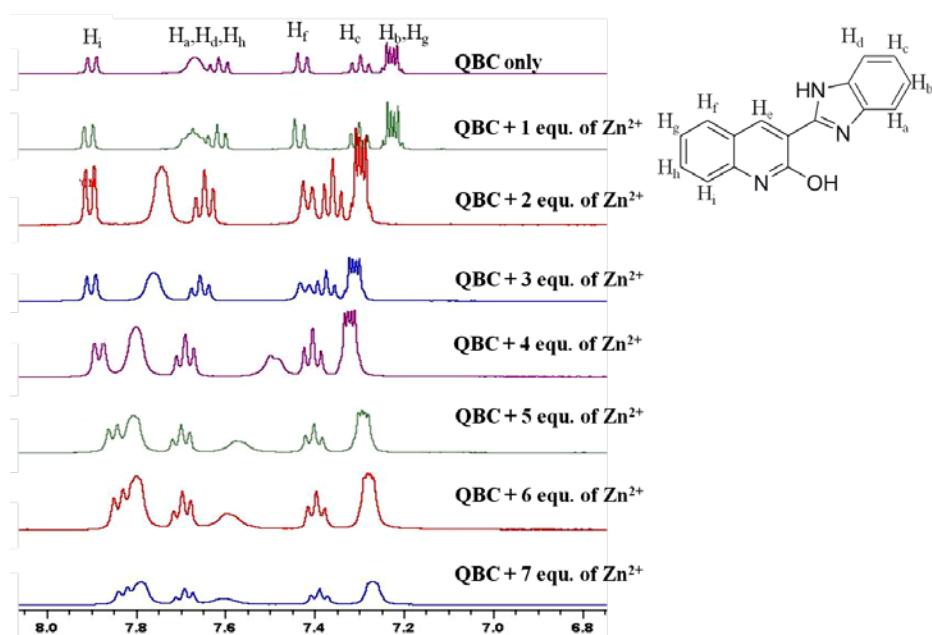

**Fig. S13.** Partial  $^1\text{H}$ -NMR titration spectrum of **QBC** with different equ. of  $\text{Zn}^{2+}$



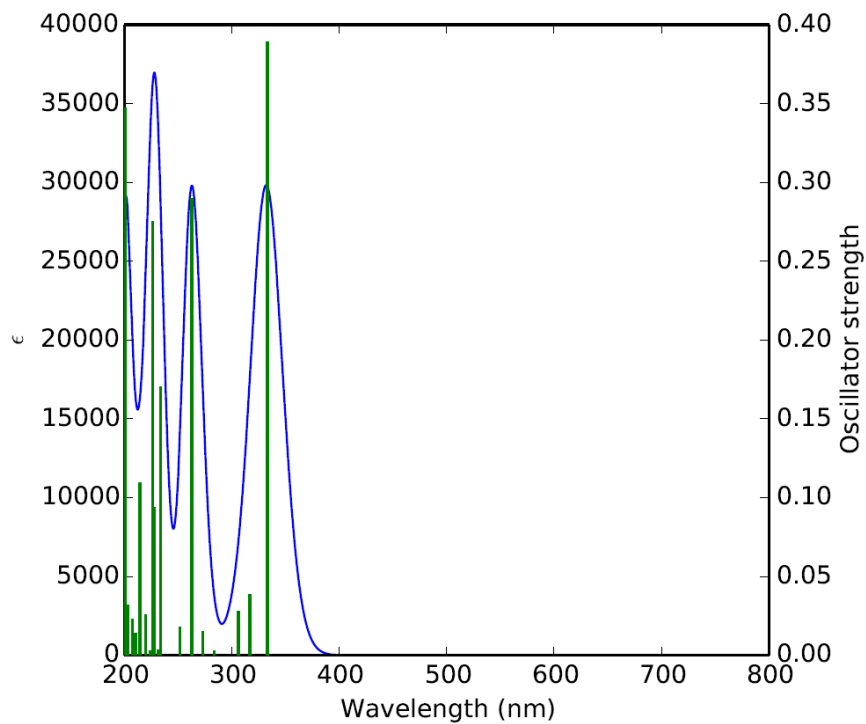

**Fig. S14.** TD spectra of **QBC** by Gaussian 03 at B3LYP/6-31G level of theory

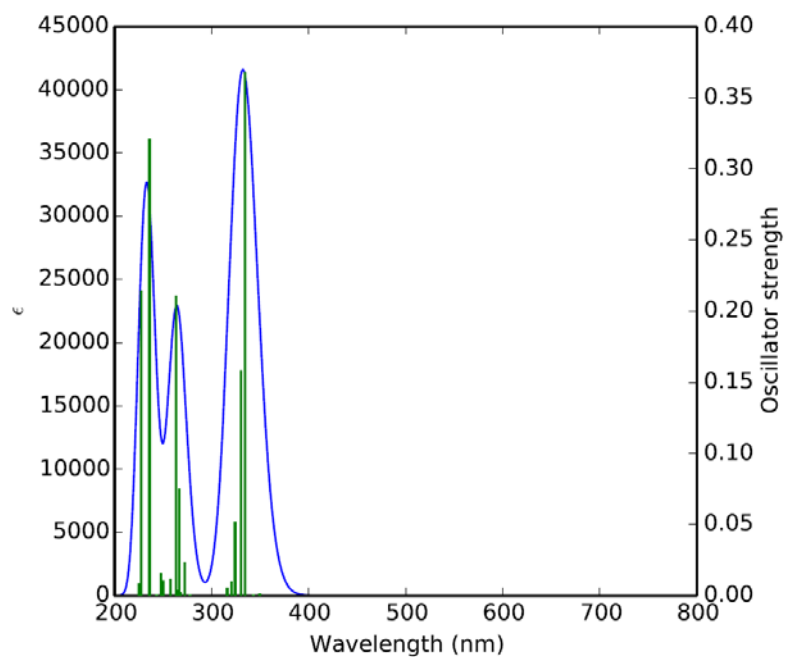

**Fig. S15.** TD spectra of **QBC-Zn<sup>2+</sup>** by Gaussian 03 at B3LYP/6-31G level of theory

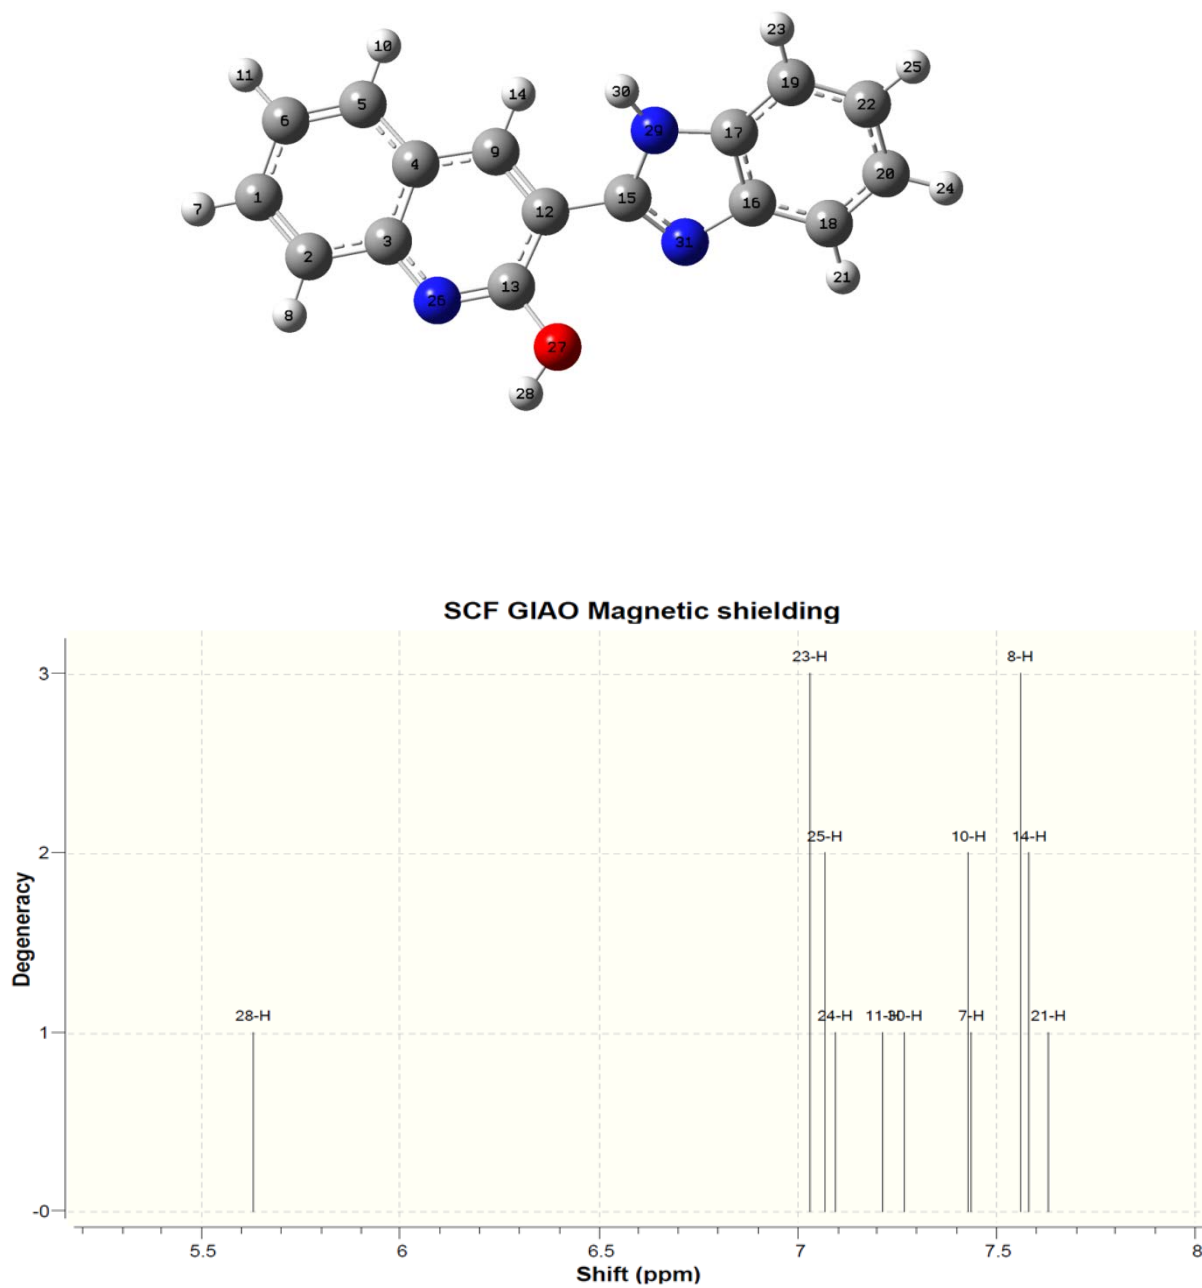

**Fig. S16.**  $^1\text{H}$  NMR spectra of **QBC** by Gaussian 03 at SCF /6-31G level of theory.

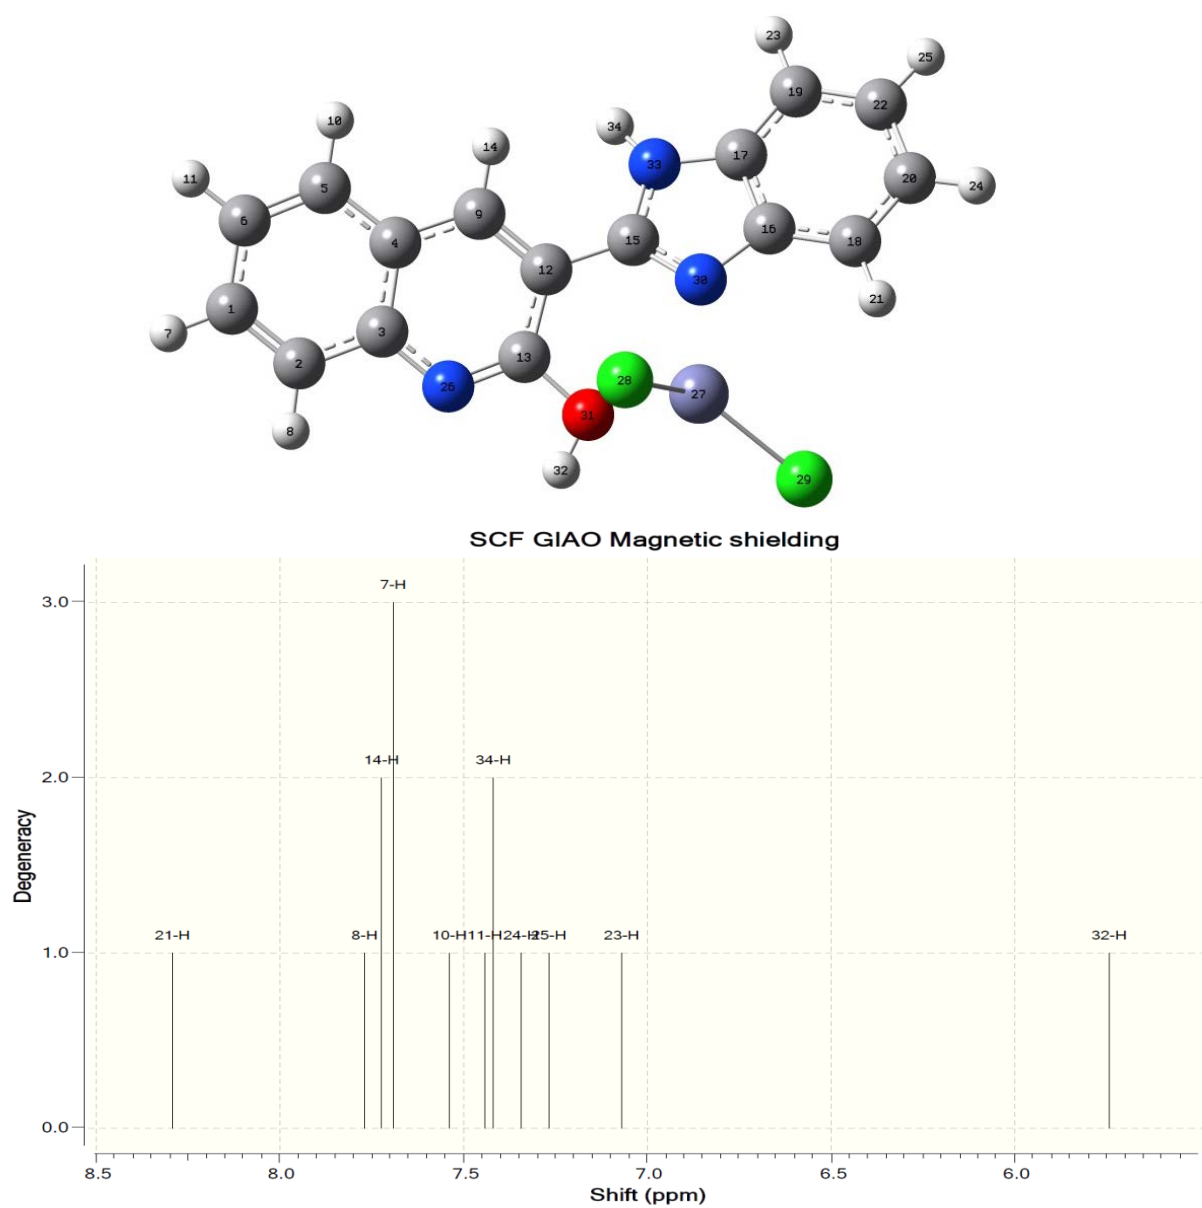

**Fig. S17.** <sup>1</sup>H NMR spectra of **QBC**+Zn<sup>2+</sup> by Gaussian 03 at SCF /6-31G level of theory

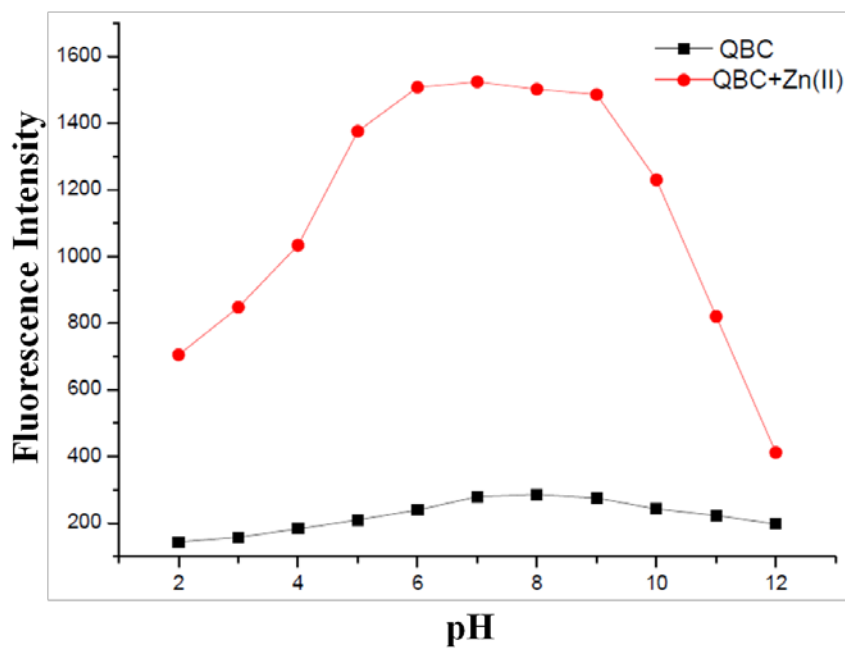

**Fig. S18.** The effect of pH **QBC** and **QBC + Zn<sup>2+</sup>** in CH<sub>3</sub>CN-H<sub>2</sub>O (1;1 v/v) solutions at different pH values.

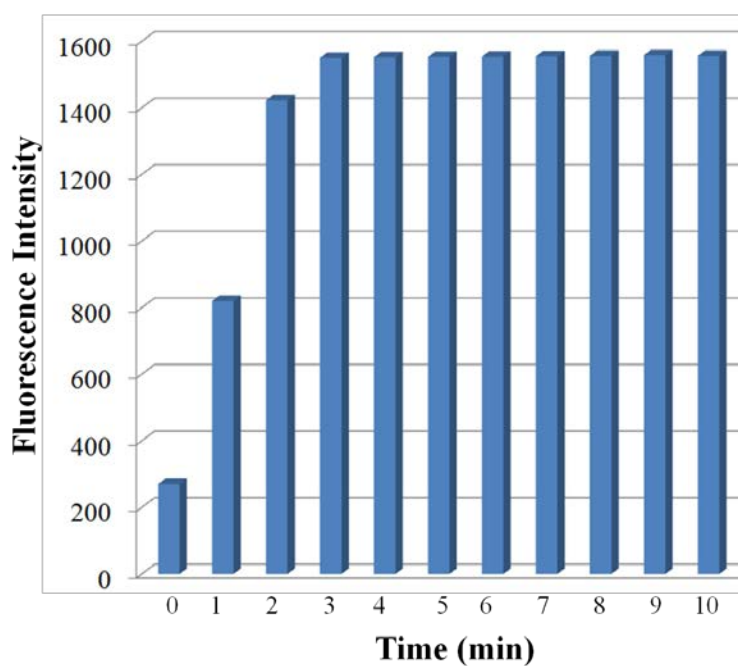

**Fig. S19.** The effective time response of **QBC** and **QBC + Zn<sup>2+</sup>** in (CH<sub>3</sub>CN-H<sub>2</sub>O, 1;1 v/v, HEPES = 50 mM, pH=7.0)

## Experimental Section

### Materials and instruments

All solvents were purchased commercially with reagents grade quality. O-phenylenediamine was obtained from Merck and was used without further purification. 3-formyl-2-quinolone was prepared by literature procedure [29].  $^1\text{H}$  NMR and  $^{13}\text{C}$  NMR spectra were recorded on a Bruker 400 MHz spectrometer, DMSO- $d_6$  solution with TMS as internal standard. LC-MS were determined on a LC-MSD-Trap-XCT Plus based on infusion methods. Absorption spectra were made on a Shimadzu UV-240 spectrophotometer. Fluorescence measurements were performed on a Jasco FP-8200 spectrofluorimeter equipped with quartz cuvettes of 1 cm path length. The excitation and emission slit widths were 5.0 nm. All absorption and emission spectra were recorded at  $24 \pm 1$  °C. Stock solutions for analysis were prepared ( $2 \times 10^{-3}\text{M}$  for compound **QBC** ( $\text{CH}_3\text{CN}/\text{H}_2\text{O}$ , 1:1 (v/v), HEPES=50 mM, pH=7.0) immediately before the experiments. The solutions of metal ions were prepared from chloride and nitrate salts of  $\text{Na}^+$ ,  $\text{K}^+$ ,  $\text{Mg}^{2+}$ ,  $\text{Ca}^{2+}$ ,  $\text{Zr}^{2+}$ ,  $\text{Ba}^{2+}$ ,  $\text{Cd}^{2+}$ ,  $\text{Mn}^{2+}$ ,  $\text{Co}^{2+}$ ,  $\text{Ni}^{2+}$ ,  $\text{Cu}^{2+}$ ,  $\text{Cr}^{3+}$ ,  $\text{Zn}^{2+}$ ,  $\text{Pb}^{2+}$ ,  $\text{Hg}^{2+}$ ,  $\text{Al}^{3+}$ ,  $\text{Fe}^{3+}$ ,  $\text{Ce}^{3+}$ ,  $\text{Fe}^{2+}$  and  $\text{Ag}^+$ .

### Absorption and fluorescence titration experiments

Stock solutions of  $\text{Zn}^{2+}$  ions (100 equiv.) and the receptor **QBC** ( $4 \times 10^{-6}\text{M}$ ) were prepared in  $\text{CH}_3\text{CN}-\text{H}_2\text{O}$  (1:1 v/v, HEPES=50 mM, pH=7.0) solutions and used for absorption and fluorescence titration experiments. The titration spectrum of **QBC** with  $\text{Zn}^{2+}$  (0–100 equiv.) was carried out in  $\text{CH}_3\text{CN}-\text{H}_2\text{O}$  solutions (1:1 v/v, HEPES=50 mM, pH=7.0) shown in Fig. 2 & 5. For the absorbance and fluorescence experiments 1 cm width and 4 cm height cuvette were used. The excitation was carried out at 380 nm for **QBC** with 5 nm emission slit widths in spectrofluorometer.
